# Supplementary material for: Catatonia in Ugandan children with nodding syndrome and effects of treatment with lorazepam: a pilot study
Source: PubMed Central journal article supplement (PMC4693437; doi:10.1186/s13104-015-1805-5), 2015-12-28

**Supplementary Figure 1: Map of Uganda showing Pader district.**

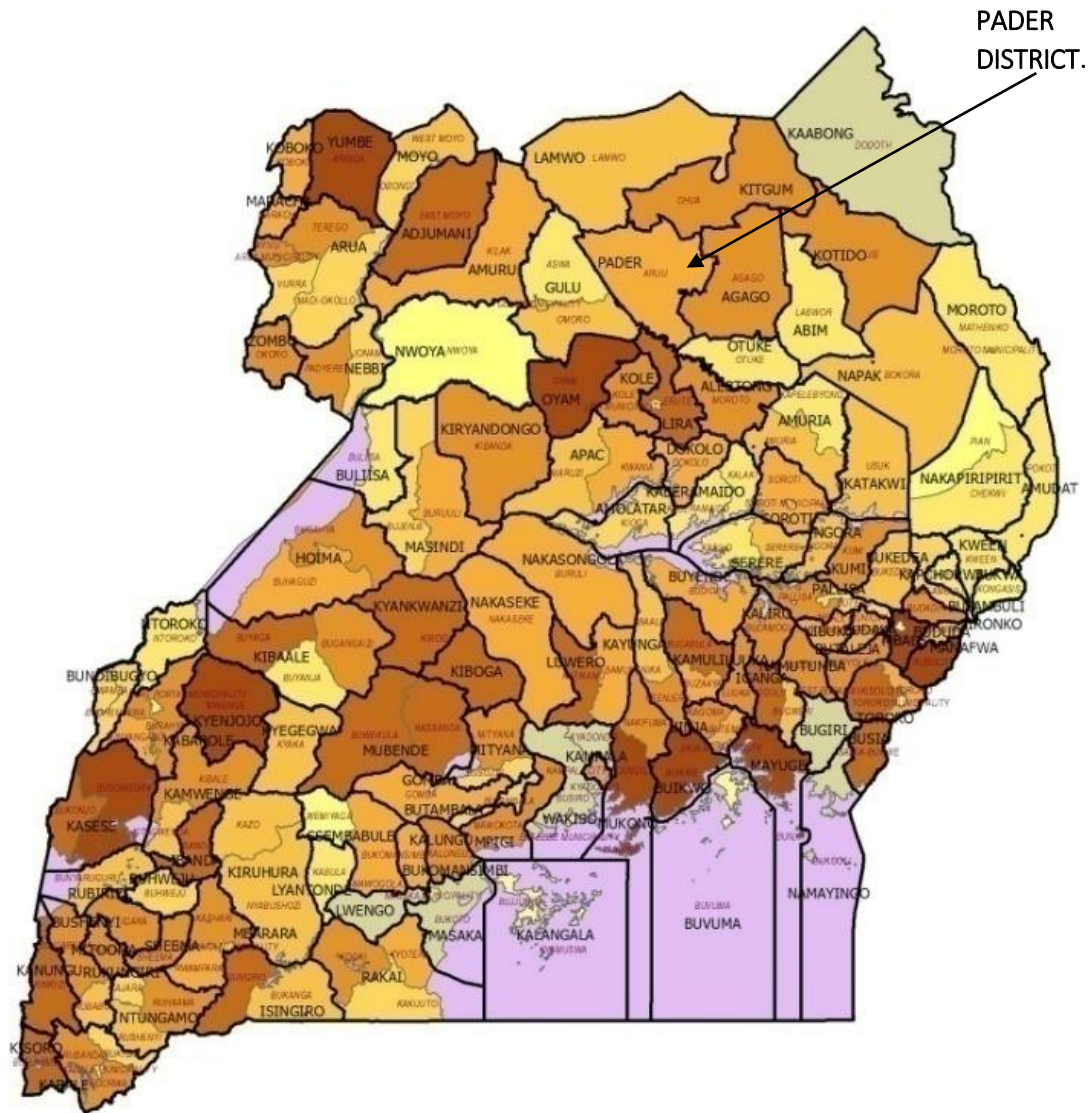

Supplement: 13104_2015_1805_MOESM1_ESM.pdf [file 13104_2015_1805_MOESM1_ESM.pdf]
