# Supplementary material for: Catatonia in Ugandan children with nodding syndrome and effects of treatment with lorazepam: a pilot study
Source: PubMed Central journal article supplement (PMC4693437; doi:10.1186/s13104-015-1805-5), 2015-12-28
Supplement: 13104_2015_1805_MOESM2_ESM.pdf [file 13104_2015_1805_MOESM2_ESM.pdf]

**Supplementary Table 1:** Consensus case definition for nodding syndrome - Uganda, 2012<sup>#</sup>

| Type of case          | Consensus case definition                                                                                                                                                                                                                                                                                                                                                                                                                                                                                                                                                                                                                                                                                                 |
|-----------------------|---------------------------------------------------------------------------------------------------------------------------------------------------------------------------------------------------------------------------------------------------------------------------------------------------------------------------------------------------------------------------------------------------------------------------------------------------------------------------------------------------------------------------------------------------------------------------------------------------------------------------------------------------------------------------------------------------------------------------|
| <b>Suspected case</b> | Reported head nodding (repetitive involuntary drops of the head towards the chest on two or more occasions) in a previously normal person                                                                                                                                                                                                                                                                                                                                                                                                                                                                                                                                                                                 |
| <b>Probable case</b>  | <p>Suspected case of head nodding, with both major criteria:</p> <ul style="list-style-type: none"> <li>• Age of onset of nodding ranging from 3 to 18 years</li> <li>• Frequency of nodding 5–20 per minute</li> </ul> <p>Plus at least one of the following minor criteria:</p> <ul style="list-style-type: none"> <li>• Other neurologic abnormalities (cognitive decline, school dropout because of cognitive or behavioral problems, other seizures or neurologic abnormalities)</li> <li>• Clustering in space or time with similar cases</li> <li>• Triggering by food or cold weather</li> <li>• Stunting or wasting</li> <li>• Delayed sexual or physical development</li> <li>• Psychiatric symptoms</li> </ul> |
| <b>Confirmed case</b> | <p>Probable case, with documented nodding episode</p> <ul style="list-style-type: none"> <li>• Observed and recorded by a trained health-care worker, or</li> <li>• Videotaped nodding episode, or</li> <li>• Video/EEG/EMG documenting head nodding as atonic seizures</li> </ul>                                                                                                                                                                                                                                                                                                                                                                                                                                        |

**Abbreviations:** EEG = electroencephalographic; EMG = electromyographic.

<sup>#</sup>The consensus case definition was drafted at the first International Scientific Meeting on Nodding Syndrome, held July 30–August 1, 2012,

in Kampala, Uganda. Meeting report available at [http://www.who.int/neglected\\_diseases/diseases/Nodding\\_syndrom\\_Kampala\\_Report\\_2012.pdf](http://www.who.int/neglected_diseases/diseases/Nodding_syndrom_Kampala_Report_2012.pdf)
